# Supplementary material
Source: publisher figshare collection journal article supplement (https://diabetesjournals.figshare.com/ndownloader/files/39583390)
Supplement: Supplementary file 1 [file 39583390]

# The Broader Economic Value of Treatment for DME

## Appendix

### 1. Overview

We developed a microsimulation based on data from the Health and Retirement Study (HRS; a nationally representative longitudinal dataset of Americans aged 51 and older) that predicts outcomes such as life expectancy, QALY, employment, disability, and self-reported vision (SRV). Because clinical trial data in ophthalmology reports outcomes in terms of visual acuity (VA), we required a mapping from VA to SRV. We used the National Health and Nutrition Examination Study (NHANES; a nationally representative survey of Americans) which has data for both VA and SRV to generate a mapping between these outcomes. We used this mapping to estimate the SRV treatment effects for DRCR clinical trials. eeFigure 1 provides a conceptual framework of our modeling approach.

**eFigure 1. Conceptual framework**

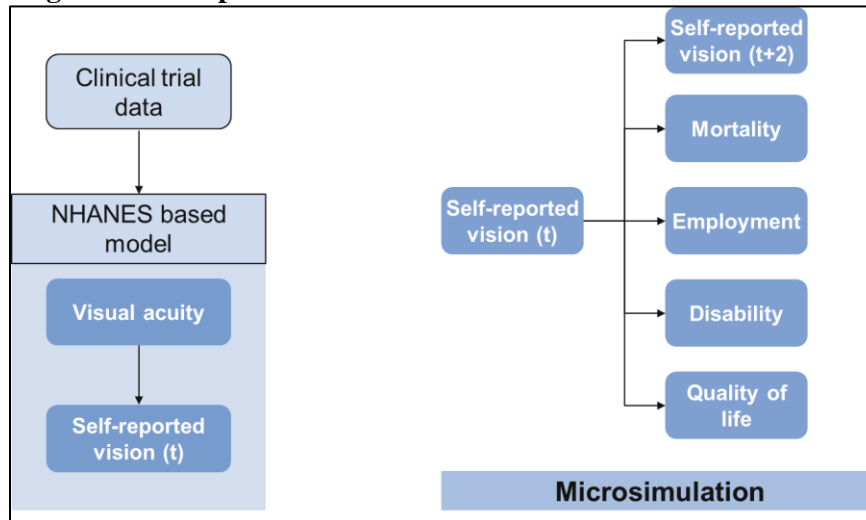

### 2. Future Elderly Model

#### 2.1. Summary of the Future Elderly Model

The Future Elderly Model (FEM) is a microsimulation model originally developed out of an effort to examine health and health care costs among the elderly Medicare population (age 65+). A description of the previous version of the model can be found in Goldman et al. (2004).[1] The original work was founded by the Centers for Medicare and Medicaid Services and carried out by a team of researchers composed of Dana P. Goldman, Paul G. Shekelle, Jayanta Bhattacharya, Michael Hurd, Geoffrey F. Joyce, Darius N. Lakdawalla, Dawn H. Matsui, Sydne J. Newberry, Constantijn W. A. Panis and Baoping Shang.

Since then, various extensions have been implemented to the original model. The most recent version now projects health outcomes for all Americans aged 51 and older and uses the HRS as a host dataset rather than the Medicare Current Beneficiary Survey (MCBS). The work has also been extended to include economic outcomes such as earnings, labor force participation and pensions. This work was funded by the National Institute on Aging through its support of the RAND Roybal Center for Health Policy Simulation (P30AG024968), the Department of Labor through contract J-9-P-2-0033, the National

Institutes of Aging through the R01 grant “Integrated Retirement Modeling” (R01AG030824) and the MacArthur Foundation Research Network on an Aging Society. A full technical appendix for that project is available here: <https://healthpolicy.box.com/v/AD-FEM-Appendix>.

## 2.2. Extending FEM to Incorporate Vision

### 2.2.1. Vision Measures

For this project we expanded the FEM to incorporate measures of vision from the HRS. Self-reported vision (SRV) is assessed each wave, and analogous questions are asked for near and distance vision. We focused on overall SRV because our implementation of the DME treatment effects relies on a mapping from visual acuity (VA) to SRV derived from the NHANES, which also uses overall SRV. eeTable 1 provides a summary of SRV questions for the HRS and NHANES and the final SRV categories used in the FEM.

**eTable 1. Summary of Self-Reported Vision and Response Standardization**

| Dataset               | Question                                                                                                | Response options                               | FEM: Final SRV categories<br>(Original response %) |                 |                 |                                        |
|-----------------------|---------------------------------------------------------------------------------------------------------|------------------------------------------------|----------------------------------------------------|-----------------|-----------------|----------------------------------------|
|                       |                                                                                                         |                                                | Excellent                                          | Good            | Fair            | Poor                                   |
| NHANES<br>(1999-2008) | At the present time, would you say your eyesight, with glasses or contact lenses if you wear them is... | Excellent<br>Good<br>Fair<br>Poor<br>Very Poor | Excellent<br>(24.3%)                               | Good<br>(49.5%) | Fair<br>(20.4%) | Poor<br>(4.5%);<br>Very Poor<br>(1.3%) |
| HRS*<br>(Waves 5-9)   | Rate your eyesight while wearing glasses or corrective lenses as usual                                  | Excellent<br>Very Good<br>Good<br>Fair<br>Poor | Excellent<br>(9.3%);<br>Very Good<br>(25.5%)       | Good<br>(42.5%) | Fair<br>(16.3%) | Poor<br>(5.9%);<br>Blind<br>(0.5%)     |
| HRS*<br>(Waves 9-12)  | Rate your eyesight while wearing glasses or corrective lenses as usual                                  | Excellent<br>Very Good<br>Good<br>Fair<br>Poor | Excellent<br>(8.3%);<br>Very Good<br>(25.3%)       | Good<br>(41.4%) | Fair<br>(18.3%) | Poor<br>(6.4%);<br>Blind<br>(0.3%)     |

\*While not an explicit response option, <1% of the sample voluntarily told the interviewer that their SRV was blind.

### 2.2.2. Vision Transition Model

The estimated model coefficients for the vision models (people under 65, people 65 and older who have had cataract surgery, and people 65 and older who have not had cataract surgery) are provided in eTable2, and the estimated coefficients on the SRV variables in the non-vision outcome models are in eTable3.

**eTable 2. SRV Model Coefficients**

|                   | Under 65             | Over 65,<br>cataract surgery | Over 65, no<br>cataract surgery |
|-------------------|----------------------|------------------------------|---------------------------------|
| Good vision (lag) | 0.3716<br>(0.2473)   | 0.4826*<br>(0.2738)          | 0.8800***<br>(0.0566)           |
| Fair vision (lag) | 0.7862**<br>(0.3137) | 1.2250***<br>(0.2959)        | 1.6559***<br>(0.0776)           |

|                                            |                       |                       |                       |
|--------------------------------------------|-----------------------|-----------------------|-----------------------|
| Poor vision (lag)                          | 0.3995<br>(0.5553)    | 1.5740***<br>(0.3893) | 2.3562***<br>(0.1464) |
| Good vision (lag) x age less than 65 (lag) | 0.0096**<br>(0.0043)  |                       |                       |
| Fair vision (lag) x age less than 65 (lag) | 0.0138**<br>(0.0055)  |                       |                       |
| Poor vision (lag) x age less than 65 (lag) | 0.0336***<br>(0.0097) |                       |                       |
| Age less than 65 (lag)                     | -0.011***<br>(0.0033) |                       |                       |
| Good vision (lag) x age 65-74 (lag)        |                       | 0.0002<br>(0.0341)    | -0.007<br>(0.0097)    |
| Fair vision (lag) x age 65-74 (lag)        |                       | -0.042<br>(0.0369)    | 0.0194<br>(0.0178)    |
| Poor vision (lag) x age 65-74 (lag)        |                       | -0.025<br>(0.0481)    | -0.001<br>(0.0036)    |
| Good vision (lag) x age 75+ (lag)          |                       | -0.008<br>(0.0179)    | 0.0028<br>(0.0043)    |
| Fair vision (lag) x age 75+ (lag)          |                       | 0.0072<br>(0.0190)    | 0.0307<br>(0.0061)    |
| Poor vision (lag) x age 75+ (lag)          |                       | 0.0097<br>(0.0229)    | 0.0197***<br>(0.0056) |
| Age 65-74 (lag)                            |                       | 0.0139<br>(0.0293)    | 0.0178***<br>(0.0028) |
| Age 75+ (lag)                              |                       | 0.0243<br>(0.0153)    | -0.043***<br>(0.0140) |
| Male indicator                             | -0.031**<br>(0.0158)  | 0.0706<br>(0.0490)    | 0.1825***<br>(0.0206) |
| Race/ethnicity: Black                      | 0.2775***<br>(0.0197) | 0.3006***<br>(0.0782) | 0.2366***<br>(0.0266) |
| Race/ethnicity: Hispanic                   | 0.3955***<br>(0.0235) | 0.3529***<br>(0.0949) | 0.1354***<br>(0.0187) |
| Less than high school education            | 0.2029***<br>(0.0258) | 0.1390**<br>(0.0656)  | -0.132***<br>(0.0155) |
| College education                          | -0.214***<br>(0.0175) | -0.117**<br>(0.0533)  | 0.0039***<br>(0.0174) |
| Cancer (lag)                               | 0.0291<br>(0.0304)    | -0.113*<br>(0.0596)   | 0.0388<br>(0.0228)    |
| Diabetes (lag)                             | 0.0766***<br>(0.0280) | -0.008<br>(0.0780)    | 0.0056*<br>(0.0014)   |
| Years since diabetes diagnosis (lag)       | 0.0084***<br>(0.0021) | 0.0132***<br>(0.0046) | 0.0898***<br>(0.0159) |
| Heart attack (lag)                         | 0.1334***<br>(0.0255) | 0.0864<br>(0.0539)    | 0.0560***<br>(0.0149) |
| Hypertension (lag)                         | 0.0980***<br>(0.0170) | 0.0063<br>(0.0515)    | 0.1636***<br>(0.0227) |
| Lung (lag)                                 | 0.2914***<br>(0.0321) | 0.0661<br>(0.0750)    | 0.0869***<br>(0.0226) |
| Stroke (lag)                               | 0.1420***<br>(0.0409) | 0.2364***<br>(0.0799) | -0.063***<br>(0.0159) |

|                        |                       |                    |                       |
|------------------------|-----------------------|--------------------|-----------------------|
| Smoke (lag)            | 0.1836***<br>(0.0195) | -0.007<br>(0.0836) | 0.0987***<br>(0.0245) |
| High cholesterol (lag) | -0.084***<br>(0.0189) | 0.0213<br>(0.0506) | 0.0053<br>(0.0145)    |
| Cut1                   | -0.2351               | 0.6077             | 0.4711                |
| Cut2                   | 1.2417                | 1.8632             | 1.9256                |
| Cut3                   | 2.4614                | 2.6943             | 3.0254                |
| N                      | 22,222                | 2,326              | 28,212                |

Notes: Coefficients from an ordered probit model with SRV (1=Excellent; 2=Good; 3=Fair; 4=Poor) as the dependent variable using HRS waves 9-12. Standard errors in parenthesis. Excluded SRV category for covariates=Excellent. We considered models that included both one period and two period lags of SRV and found that the coefficients on the two period lag were statistically insignificant. Significance: \*\*\*p<0.01; \*\*p<0.05; \*p<0.1

**eTable 3. Effect of SRV on Non-vision Outcomes**

|                   | Employed              | Claim disability      | Mortality             | ADL status            | IADL status           | HUI3                  |
|-------------------|-----------------------|-----------------------|-----------------------|-----------------------|-----------------------|-----------------------|
| Good vision (lag) | -0.085***<br>(0.0140) | 0.2707***<br>(0.0312) | 0.0961***<br>(0.0229) | 0.1864***<br>(0.0156) | 0.1731***<br>(0.0195) | -0.066***<br>(0.0145) |
| Fair vision (lag) | -0.245***<br>(0.0199) | 0.4987***<br>(0.0372) | 0.1983***<br>(0.0274) | 0.4465***<br>(0.0190) | 0.4302***<br>(0.0229) | -0.113***<br>(0.0210) |
| Poor vision (lag) | -0.641***<br>(0.0370) | 0.7701***<br>(0.0517) | 0.3575***<br>(0.0338) | 0.7662***<br>(0.0259) | 0.9019***<br>(0.0287) | -0.194***<br>(0.0337) |
| Estimation method | Probit                | Probit                | Probit                | Ordered probit        | Ordered probit        | OLS                   |

Notes: Each column presents coefficients on SRV (excluded category=Excellent) from a model with the dependent variable listed in the top row. All models except HUI3 include controls for age, gender, race/ethnicity, education. All models include controls for comorbidities.

### 2.2.3. Model Validation Results

**eTable 4. Actual and Simulated SRV Distribution, 2014**

| SRV Category | HRS (full sample) |           | Diabetes subpopulation |           |
|--------------|-------------------|-----------|------------------------|-----------|
|              | Actual            | Simulated | Actual                 | Simulated |
| Excellent    | 0.3790            | 0.3737    | 0.2996                 | 0.2653    |
| Good         | 0.4058            | 0.4061    | 0.4141                 | 0.4078    |
| Fair         | 0.1631            | 0.1587    | 0.2025                 | 0.2086    |
| Poor         | 0.0521            | 0.0615    | 0.0838                 | 0.1183    |

**eFigure 2. Actual SRV (2004-2014) and Simulated SRV (2016-2040)**

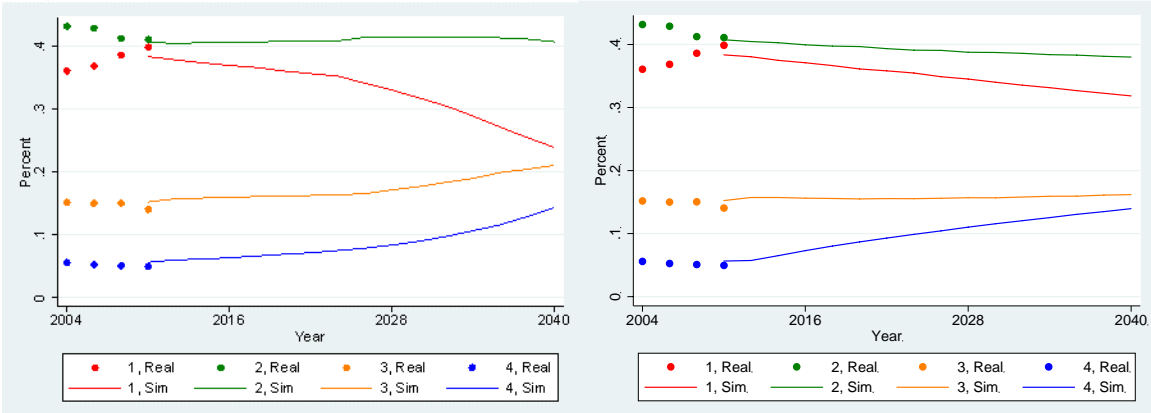

Notes: Left panel presents a cohort simulation. Right panel presents a population simulation, which allows new entrants in the model each cycle.

**eFigure 3. Actual SRV (2004-2014) and Simulated SRV (2016-2040), Diabetes Subpopulation**

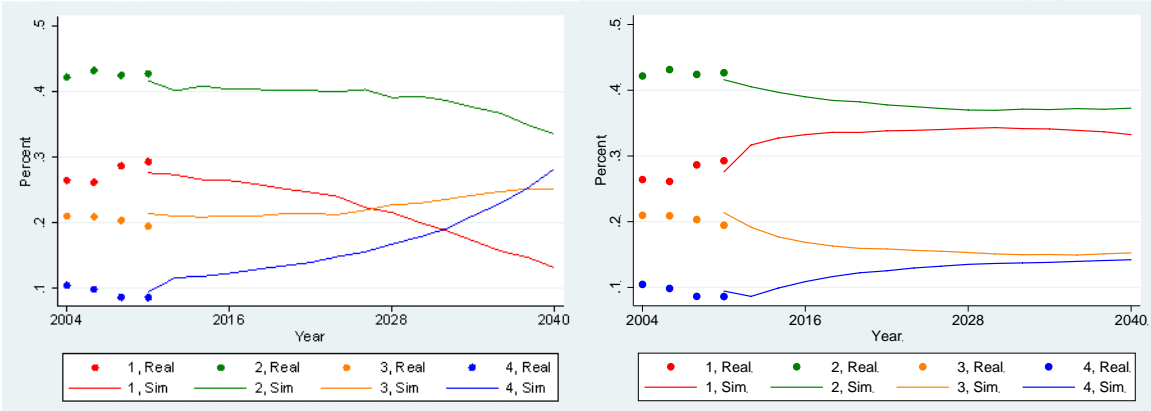

Notes: Left panel presents a cohort simulation. Right panel presents a population simulation, which allows new entrants in the model each cycle.

**eTable 5. Actual and simulated outcomes**

| Outcome       | Actual HRS | Microsimulation Outcomes (Cohort) |        |        |        |        |
|---------------|------------|-----------------------------------|--------|--------|--------|--------|
|               | 2010       | 2010                              | 2012   | 2014   | 2016   | 2018   |
| Excellent SRV | 0.3988     | 0.3835                            | 0.3785 | 0.3737 | 0.3695 | 0.3662 |
| Good SRV      | 0.4110     | 0.4074                            | 0.4039 | 0.4061 | 0.4065 | 0.4066 |
| Fair SRV      | 0.1407     | 0.1525                            | 0.1573 | 0.1587 | 0.1603 | 0.1607 |
| Poor SRV      | 0.0496     | 0.0566                            | 0.0602 | 0.0615 | 0.0637 | 0.0664 |
| Mortality     | N/A        | 0.0540                            | 0.0468 | 0.0501 | 0.0538 | 0.0577 |
| Employment    | 0.3830     | 0.4408                            | 0.4208 | 0.3839 | 0.3475 | 0.3097 |
| ADL or IADL   | 0.2088     | 0.2300                            | 0.2340 | 0.2453 | 0.2559 | 0.2672 |
| HUI3          | 0.7627     | 0.7374                            | 0.7324 | 0.7264 | 0.7198 | 0.7124 |

Notes: Results are from a cohort simulation.

**eTable 6. Actual and simulated outcomes, diabetes subpopulation**

| Outcome       | Actual HRS | Microsimulation Outcomes (Cohort) |        |        |        |        |
|---------------|------------|-----------------------------------|--------|--------|--------|--------|
|               | 2010       | 2010                              | 2012   | 2014   | 2016   | 2018   |
| Excellent SRV | 0.2927     | 0.2758                            | 0.2730 | 0.2653 | 0.2640 | 0.2586 |
| Good SRV      | 0.4265     | 0.4159                            | 0.4007 | 0.4078 | 0.4028 | 0.4026 |
| Fair SRV      | 0.1946     | 0.2137                            | 0.2101 | 0.2086 | 0.2104 | 0.2100 |
| Poor SRV      | 0.0862     | 0.0946                            | 0.1163 | 0.1183 | 0.1228 | 0.1288 |
| Mortality     | N/A        | 0.0813                            | 0.0794 | 0.0834 | 0.0870 | 0.0922 |
| Employment    | 0.2846     | 0.3135                            | 0.2987 | 0.2676 | 0.2377 | 0.2063 |
| ADL or IADL   | 0.3118     | 0.3542                            | 0.3535 | 0.3692 | 0.3817 | 0.3921 |
| HUI3          | 0.6167     | 0.6477                            | 0.6448 | 0.6372 | 0.6293 | 0.6213 |

Notes: Results are from a cohort simulation.

### 3. Mapping VA to SRV

#### 3.1. SRV Data Checks

We conducted several analyses to explore the suitability of SRV as a measure of vision. First, we used the HRS to check the correlation between overall SRV and near and distance vision (both self-reported) and the stability of the relationship across study waves (eeTable 7-eeTable 10). Second, we checked whether the relationship between VA and SRV was relatively stable over the years when NHANES collected vision data (eeTable 11). Finally, we used the NHIS to confirm that the SRV distribution has been relatively stable since 2008 (eeTable 12).

**eTable 7. Correlation between Overall, Distance, and Near SRV**

|                             |                 | Waves<br>5-12 | Wave<br>5 | Wave<br>6 | Wave<br>7 | Wave<br>8 | Wave<br>9 | Wave<br>10 | Wave<br>11 | Wave<br>12 |
|-----------------------------|-----------------|---------------|-----------|-----------|-----------|-----------|-----------|------------|------------|------------|
| Full<br>sample              | Distance<br>SRV | 0.687         | 0.717     | 0.713     | 0.691     | 0.697     | 0.668     | 0.659      | 0.672      | 0.682      |
|                             | Near<br>SRV     | 0.679         | 0.718     | 0.713     | 0.689     | 0.698     | 0.664     | 0.643      | 0.656      | 0.660      |
| Diabetes,<br>over age<br>50 | Distance<br>SRV | 0.688         | 0.717     | 0.713     | 0.694     | 0.697     | 0.669     | 0.662      | 0.674      | 0.683      |
|                             | Near<br>SRV     | 0.681         | 0.718     | 0.714     | 0.690     | 0.700     | 0.665     | 0.647      | 0.658      | 0.661      |

**eTable 8. Distribution of Distance and Overall SRV**

|              |           | SRV (Overall) |        |        |        |
|--------------|-----------|---------------|--------|--------|--------|
|              |           | Excellent     | Good   | Fair   | Poor   |
| Distance SRV | Excellent | 67.03%        | 26.53% | 5.58%  | 0.87%  |
|              | Good      | 12.43%        | 67.32% | 17.34% | 2.91%  |
|              | Fair      | 2.94%         | 17.95% | 64.94% | 14.17% |
|              | Poor      | 1.08%         | 6.56%  | 19.05% | 73.31% |

Notes: Results generated using HRS waves 5-12 pooled. Sample was limited to people with diabetes over the age of 50. Excellent SRV combines the 'Excellent' and 'Very Good' responses in the HRS; Poor SRV combines the 'Poor' and 'Blind' responses in the HRS.

**eTable 9. Distribution of Near and Overall SRV**

|          |           | SRV (Overall) |        |        |        |
|----------|-----------|---------------|--------|--------|--------|
|          |           | Excellent     | Good   | Fair   | Poor   |
| Near SRV | Excellent | 71.82%        | 23.42% | 4.18%  | 0.57%  |
|          | Good      | 15.62%        | 67.09% | 14.99% | 2.3%   |
|          | Fair      | 5.93%         | 26.03% | 57.12% | 10.92% |
|          | Poor      | 3.8%          | 12.08% | 26.91% | 57.2%  |

Notes: Results generated using HRS waves 5-12 pooled. Sample was limited to people with diabetes over the age of 50. Excellent SRV combines the 'Excellent' and 'Very Good' responses in the HRS; Poor SRV combines the 'Poor' and 'Blind' responses in the HRS.

**eTable 10. Distribution of Near and Distance SRV**

|          |           | Distance SRV |        |        |        |
|----------|-----------|--------------|--------|--------|--------|
|          |           | Excellent    | Good   | Fair   | Poor   |
| Near SRV | Excellent | 83.04%       | 14.54% | 1.97%  | 0.45%  |
|          | Good      | 21.03%       | 70.23% | 7.12%  | 1.62%  |
|          | Fair      | 16.21%       | 37.62% | 39.42% | 6.75%  |
|          | Poor      | 12.1%        | 25.52% | 18.16% | 44.22% |

Notes: Results generated using HRS waves 5-12 pooled. Sample was limited to people with diabetes over the age of 50. Excellent SRV combines the 'Excellent' and 'Very Good' responses in the HRS; Poor SRV combines the 'Poor' and 'Blind' responses in the HRS.

**eTable 11. SRV Distribution by VA and NHANES Survey Year**

|                                 |               | SRV Category |        |        |        |
|---------------------------------|---------------|--------------|--------|--------|--------|
|                                 |               | Excellent    | Good   | Fair   | Poor   |
| Better eye: VA 20/20-20/40      | NHANES sample |              |        |        |        |
|                                 | 1999-2000     | 22.18%       | 48.5%  | 23.24% | 6.08%  |
|                                 | 2001-2002     | 24.23%       | 53.55% | 17.68% | 4.53%  |
|                                 | 2003-2004     | 30.53%       | 47.86% | 18.12% | 3.49%  |
|                                 | 2005-2006     | 28.41%       | 52.21% | 16.29% | 3.09%  |
| Better eye: VA worse than 20/40 | 2007-2008     | 24.5%        | 51.43% | 20.09% | 3.98%  |
|                                 | 1999-2000     | 11.11%       | 34.92% | 30.69% | 23.28% |
|                                 | 2001-2002     | 10.63%       | 43.48% | 28.5%  | 17.39% |
|                                 | 2003-2004     | 13.73%       | 37.34% | 32.62% | 16.31% |
|                                 | 2005-2006     | 10.78%       | 39.22% | 28.92% | 21.08% |
| Worse eye: VA 20/20-20/40       | 2007-2008     | 10.43%       | 39.21% | 32.01% | 18.35% |
|                                 | 1999-2000     | 25.25%       | 49.36% | 20.62% | 4.78%  |
|                                 | 2001-2002     | 27.16%       | 54.17% | 15.75% | 2.92%  |
|                                 | 2003-2004     | 33.88%       | 47.49% | 15.68% | 2.96%  |
|                                 | 2005-2006     | 31.11%       | 51.63% | 15.02% | 2.24%  |

|                                      |           |        |        |        |        |
|--------------------------------------|-----------|--------|--------|--------|--------|
|                                      | 2007-2008 | 25.9%  | 53.96% | 17.1%  | 3.04%  |
| Worse eye:<br>VA worse<br>than 20/40 | 1999-2000 | 11.33% | 41.95% | 31.86% | 14.87% |
|                                      | 2001-2002 | 12.52% | 48.56% | 26.06% | 12.86% |
|                                      | 2003-2004 | 17.14% | 44.76% | 28.73% | 9.37%  |
|                                      | 2005-2006 | 15.81% | 48.85% | 23.8%  | 11.55% |
|                                      | 2007-2008 | 16.26% | 41.23% | 31.24% | 11.27% |

Notes: Results generated using NHANES 1999-2008 data; sample included all individuals who had non-missing vision data from the exam portion of the survey. The 'Poor' SRV category combines 'Poor' and 'Very Poor' responses from NHANES.

**eTable 12. SRV Distribution by NHIS Survey Year**

|      | SRV Category   |      |      |
|------|----------------|------|------|
| Year | Excellent/Good | Fair | Poor |
| 2010 | 85.5           | 12.6 | 1.9  |
| 2011 | 88.0           | 10.5 | 1.5  |
| 2012 | 83.1           | 15.2 | 1.7  |
| 2013 | 81.7           | 16.2 | 2.2  |
| 2014 | 83.5           | 14.5 | 2.0  |
| 2015 | 83.5           | 14.5 | 2.1  |
| 2016 | 84.7           | 13.7 | 1.6  |
| 2017 | 83.8           | 14.6 | 1.7  |
| 2018 | 81.4           | 16.6 | 2.0  |
| 2019 | 85.5           | 13.1 | 1.4  |
| 2020 | 84.4           | 14.1 | 1.5  |

Notes: Results generated using NHIS 2010-2020; sample included all individuals who had non-missing response to the question "Do you have difficulty seeing, even when wearing glasses?" Responses were coded to match the approximate distribution in the SRV categories: Excellent/Good (combined) corresponded to "No difficulty"; Fair corresponded to "Some difficulty", and Poor corresponded to "A lot of difficulty" and "Cannot do at all".

### 3.2. SRV Model

eeTable 13 presents the VA distribution stratified by SRV for the NHANES 2005-06 and 2007-08 waves. Although our mapping uses the diabetes population aged 50 or older, the relationship between VA distribution is similar for the full NHANES sample and the population with diabetes. The correlation between SRV and VA in the worse eye is slightly stronger than SRV and VA in the better eye irrespective of which subgroup we consider. For the diabetes population aged 50 or older, the correlation between SRV and VA in the better (worse) eye is 0.240 (0.272).

**eTable 13. VA distribution stratified by SRV**

|                                     |           | Better eye      |        | Worse eye       |        |
|-------------------------------------|-----------|-----------------|--------|-----------------|--------|
|                                     |           | 20/40 or better | <20/40 | 20/40 or better | <20/40 |
| NHANES<br>2005-2008<br>[N=9,653]    | Excellent | 95.2%           | 4.9%   | 84.9%           | 14.9%  |
|                                     | Good      | 91.7%           | 8.4%   | 76.9%           | 23.0%  |
|                                     | Fair      | 84.2%           | 15.8%  | 62.3%           | 37.8%  |
|                                     | Poor      | 66%             | 34.1%  | 42.1%           | 57.9%  |
| Diabetes<br>population<br>[N=1,085] | Excellent | 95.7%           | 4.3%   | 78.1%           | 21.9%  |
|                                     | Good      | 90.1%           | 9.9%   | 70.0%           | 30.0%  |
|                                     | Fair      | 79%             | 21.0%  | 53.7%           | 46.3%  |
|                                     | Poor      | 60%             | 40.0%  | 34.5%           | 65.6%  |
|                                     | Excellent | 96.0%           | 4.0%   | 78.2%           | 21.9%  |



|                                     |      |       |       |       |       |
|-------------------------------------|------|-------|-------|-------|-------|
| Diabetes population age 50+ [N=882] | Good | 90.3% | 9.7%  | 68.5% | 31.5% |
|                                     | Fair | 78.4% | 21.6% | 52.0% | 48.1% |
|                                     | Poor | 56.4% | 43.6% | 32.1% | 67.9% |

Notes: Results derived using NHANES 2005-06 and 2007-08 waves pooled. The ‘Poor’ SRV category combines Poor and Very Poor responses in NHANES.

**eTable 14. SRV Model: Estimated Coefficients for VA Variables**

| Visual acuity | Better eye            | Worse eye             |
|---------------|-----------------------|-----------------------|
| 20/25         | 0.0274<br>(0.1057)    | 0.2081<br>(0.1309)    |
| 20/30         | -0.041*<br>(0.1490)   | 0.3851**<br>(0.1563)  |
| 20/40         | 0.2618<br>(0.1967)    | 0.1491<br>(0.1740)    |
| 20/50         | 0.4866***<br>(0.1755) | 0.6436***<br>(0.1694) |
| 20/60         | 0.6151<br>(0.6089)    | 0.2215<br>(0.2515)    |
| 20/80         | 0.5611<br>(0.4291)    | 0.7101**<br>(0.2837)  |
| 20/200        | 0.7117<br>(0.3770)    | 0.8574***<br>(0.2152) |
| <20/200       | 2.5085***<br>(0.7739) | 0.9947***<br>(0.2702) |

Notes: Regression coefficients from an ordered probit model where the dependent variable is the four SRV categories (1=Excellent; 2=Good; 3=Fair; 4=Poor) and the sample was restricted to people with diabetes over the age of 50. Model includes controls for sex, race/ethnicity, age, and time since diabetes diagnosis. 20/20 is the omitted VA category. A positive coefficient implies that a person is more likely to have worse SRV relative to someone with 20/20 vision. This model was used to generate predictions for the starting vision distributions (see Table 1 in the main paper). Significance: \*\*\*p<0.01; \*\*p<0.05; \*p<0.1

**eTable 15. SRV Model: Estimated Coefficients for Demographic Variables**

| Variable  | Coefficient (standard error) |
|-----------|------------------------------|
| Female    | 0.0415<br>(0.0764)           |
| Hispanic  | 0.0970<br>(0.1188)           |
| Black     | 0.1166<br>(0.1024)           |
| Age 55-59 | 0.1006<br>(0.1297)           |
| Age 60-64 | -0.066<br>(0.1297)           |
| Age 65-69 | -0.154<br>(0.1302)           |
| Age 70-74 | -0.408<br>(0.1431)           |
| Age 75+   | -0.174<br>(0.1344)           |

|                                |                    |
|--------------------------------|--------------------|
| Years since diabetes diagnosis | -0.004<br>(0.0033) |
|--------------------------------|--------------------|

Notes: Regression coefficients from an ordered probit model where the dependent variable is the four SRV categories (1=Excellent; 2=Good; 3=Fair; 4=Poor) and the sample was restricted to people with diabetes over the age of 50. Model also includes controls for VA in better and worse eye. A positive coefficient implies that a person is more likely to have worse SRV. Significance: \*\*\*p<0.01; \*\*p<0.05; \*p<0.1

We adjusted the estimated cut points for the model to ensure the predicted SRV distribution matched that of the microsimulation data (i.e., HRS) rather than NHANES. The results presented in eeTable 16 imply that matching the HRS distribution requires two modifications to the original model: 1) shifting some people from the good to the excellent and fair SRV categories and 2) shifting some people from the poor to fair SRV category.

**eeTable 16. Estimated and modified SRV category model cut points**

|            | Original model cut points<br>(NHANES distribution) | Final cut points<br>(Match HRS distribution) |
|------------|----------------------------------------------------|----------------------------------------------|
| Cutpoint 1 | -0.6074                                            | -0.2845                                      |
| Cutpoint 2 | 0.9098                                             | 0.9142                                       |
| Cutpoint 3 | 2.0932                                             | 1.8613                                       |

#### 4. Untreated Scenario Implementation

First, we use the baseline data from Protocol T to classify each person's DME severity according to area and degree of retinal thickening.[2] Next, to derive their counterfactual (untreated) VA in year 2, we subtract the mean vision loss for the relevant severity category. Finally, we use the counterfactual VA data and Protocol T demographics to predict SRV using the model described in Section 3. eeTable 17 provides a summary of the mean VA for the Protocol T and counterfactual, and eeTable 18 shows how the data and counterfactual translate to the VA categories used in our mapping.

**eeTable 17. Protocol T and Untreated Counterfactual Mean VA (Letters)**

| DME severity | N (%)      | Mean VA (letters)   |                          |                                 |
|--------------|------------|---------------------|--------------------------|---------------------------------|
|              |            | Baseline Protocol T | 2-year (VEGF) Protocol T | 2-year Untreated Counterfactual |
| 1            | 54 (8.7)   | 68.1                | 79.4                     | 62.5                            |
| 2            | 41 (6.7)   | 69.6                | 79.2                     | 59.6                            |
| 3            | 32 (5.2)   | 68.5                | 80.6                     | 58.2                            |
| 4            | 58 (9.4)   | 68.2                | 77.8                     | 57.6                            |
| 5 (worst)    | 431 (70.0) | 63.5                | 75.7                     | 50.9                            |
| Full sample  | 616        | 64.9                | 76.7                     | 53.5                            |

**eeTable 18. Protocol T and Untreated Counterfactual VA Distribution**

|       | Baseline Protocol T | 2-year (VEGF) Protocol T | 2-year Untreated Counterfactual |
|-------|---------------------|--------------------------|---------------------------------|
| 20/20 | 0.0                 | 43.7                     | 0.0                             |
| 20/25 | 12.4                | 21.1                     | 0.0                             |
| 20/30 | 27.3                | 14.3                     | 1.0                             |
| 20/40 | 20.5                | 6.9                      | 6.0                             |
| 20/50 | 11.5                | 5.0                      | 22.2                            |

|         |      |     |      |
|---------|------|-----|------|
| 20/60   | 9.6  | 2.8 | 25.3 |
| 20/80   | 5.8  | 1.6 | 14.3 |
| 20/200  | 10.8 | 2.8 | 22.2 |
| <20/200 | 2.3  | 1.8 | 8.9  |

## 5. Cohort estimate input parameters

eeTable 19 presents baseline inputs used to generate cohort level estimates and their sources. Our cohort size (N=1,108,500) was derived by applying the DME incidence rate to the total US population with diabetes aged 45 or older. We then scaled up the individual level results from the microsimulation model based on the 2020 Vestrum treatment mix to derive the benefit of current treatment for DME in the U.S.

**eTable 19. Cohort Estimates: Input Parameters**

|                                               | Value                                                          | Source                                                                          |
|-----------------------------------------------|----------------------------------------------------------------|---------------------------------------------------------------------------------|
| <b>Population parameters</b>                  |                                                                |                                                                                 |
| U.S. population with diabetes, aged $\geq 45$ | 29,100,000                                                     | CDC (2020) [3]                                                                  |
| DME incidence                                 | 0.038                                                          | Varma et al (2014) [4]                                                          |
| Mean age at baseline                          | 62.78                                                          | DRCR Protocol T [5]                                                             |
| Share with Excellent SRV at baseline          | 0.2460                                                         | DRCR Protocol T [5];<br>VA to SRV mapping                                       |
| Share with Good SRV at baseline               | 0.3954                                                         | DRCR Protocol T [5];<br>VA to SRV mapping                                       |
| Share with Fair SRV at baseline               | 0.2285                                                         | DRCR Protocol T [5];<br>VA to SRV mapping                                       |
| Share with Poor SRV at baseline               | 0.1300                                                         | DRCR Protocol T [5];<br>VA to SRV mapping                                       |
| <b>Treatment weights</b>                      |                                                                |                                                                                 |
| Untreated                                     | 0.28                                                           | Vestrum 2020 analysis                                                           |
| Treated with anti-VEGFs                       | 0.68                                                           | Vestrum 2020 analysis                                                           |
| Treated with laser monotherapy                | 0.03                                                           | Vestrum 2020 analysis                                                           |
| Treated with steroid monotherapy              | 0.01                                                           | Vestrum 2020 analysis                                                           |
| <b>Annual treatment cost</b>                  |                                                                |                                                                                 |
| Untreated                                     | \$478.65                                                       | Includes cost of office visits                                                  |
| Anti-VEGF treatment (real world frequency)    | Year 1: 4,369.4<br>Year 2+: 3277.1                             | Includes cost of office visit, eye injection, and weighted average of drug cost |
| Anti-VEGF treatment (Protocol T frequency)    | Year 1: \$10,923.60<br>Year 2: 6,554.10<br>Year 3+: \$1,092.40 | Includes cost of office visit, eye injection, and weighted average of drug cost |
| Laser treatment                               | Year 1: \$2075.40<br>Year 2+: 478.65                           | Includes cost of office visits, laser therapy                                   |
| Steroid treatment*                            | Year 1: \$1304.10<br>Year 2-3: \$978.40                        | Includes cost of office visit, eye injection, and weighted average of drug cost |

Notes: See eTable 20 and eTable 21 for drug weights, treatment frequencies, and components of cost parameters used to derive annual treatment costs. \*Steroid treatment cost follows a 3 year cycle for the duration of the 20 year time horizon.

**eTable 20. Treatment Frequency and Drug Weights**

| Treatment Type | Drug weights                                                                           | Treatment frequency scenario                                                                                                                                                                          |                                                                       |
|----------------|----------------------------------------------------------------------------------------|-------------------------------------------------------------------------------------------------------------------------------------------------------------------------------------------------------|-----------------------------------------------------------------------|
|                |                                                                                        | Real world treatment frequency                                                                                                                                                                        | Protocol T treatment frequency                                        |
| Anti-VEGF      | Bevacizumab: 45%<br>Aflibercept: 36%<br>Ranibizumab: 19%                               | Year 1: 4 injections<br>Year 2+: 3 injections                                                                                                                                                         | Year 1: 10 injections<br>Year 2: 6 injections<br>Year 3+: 1 injection |
| Laser          | N/A                                                                                    | Year 1: 3 treatments<br>Year 2+: 4 office visits (no treatments)                                                                                                                                      |                                                                       |
| Steroid        | Dexamethasone implant: 64%<br>Triamcinolone acetonide: 33%<br>Fluocinolone implant: 3% | Dexamethasone intravitreal implant: 0.75 injections per year<br>Triamcinolone acetonide: 3 injections (year 1); 1 injection (years 2+)<br>Fluocinolone intravitreal implant: 0.33 injections per year |                                                                       |
| Untreated      | N/A                                                                                    | 4 office visits per year                                                                                                                                                                              |                                                                       |

Notes: Drug weights and real world treatment frequency derived from authors' analysis of Vestrum 2020 data. Protocol T treatment frequency based on mean injection data from DRCR Protocol T.[5]

**eTable 21. Cost Parameter Components (2022 USD)**

| Description                                | CPT Code | Cost       |
|--------------------------------------------|----------|------------|
| Office visit                               | 99214    | \$119.66   |
| Laser treatment                            | 67210    | \$532.24   |
| Injection cost (eye drug)                  | 67028    | \$107.72   |
| Bevacizumab (1.25mg)                       | J9035    | \$67.86    |
| Aflibercept (2mg)                          | J9400    | \$1,841.50 |
| Ranibizumab (0.3mg)                        | J2778    | \$921.60   |
| Triamcinolone Acetonide (1mg)              | J3304    | \$17.63    |
| Dexamethasone intravitreal implant (0.7mg) | J7312    | \$1400.00  |
| Fluocinolone intravitreal implant          | See note | \$7500.00  |

Note: Costs are from the 2022 Physician Fee Schedule[6]. Fluocinolone intravitreal implant was not priced by CMS at the time of our model development; cost reflects the wholesale acquisition cost.

## 6. Sensitivity analyses

**eTable 22. Simulated lifetime outcomes for a hypothetical 51-year old, treatment durability = 6 years**

|                  |                                  | Untreated | Anti-VEGF | Laser     | Steroid   |
|------------------|----------------------------------|-----------|-----------|-----------|-----------|
| Vision outcomes  | Years with Excellent or Good SRV | 15.5      | 17.1      | 16.5      | 16.5      |
|                  | Years with Fair or Poor SRV      | 12.5      | 11.8      | 11.9      | 12.0      |
| Direct effects   | Life expectancy (years)          | 28.0      | 28.8      | 28.5      | 28.5      |
|                  | Quality-adjusted life years      | 16.3      | 17.3      | 16.8      | 16.8      |
|                  | QALY (\$)                        | 1,680,698 | 1,774,349 | 1,728,763 | 1,734,005 |
| Indirect effects | Disability free life years       | 15.7      | 16.8      | 16.2      | 16.3      |
|                  | Years claiming disability        | 2.9       | 2.5       | 2.7       | 2.7       |
|                  | Disability benefits (\$)         | 14,392    | 12,433    | 13,738    | 13,295    |
|                  | Years working                    | 8.1       | 8.5       | 8.3       | 8.3       |
|                  | Earnings (\$)                    | 161,613   | 188,096   | 176,133   | 176,111   |

Notes: The value of a QALY is assumed to be \$150,000. Future dollar values are discounted at a rate of 3% per year. Disability benefits reflect government disability payments to an individual, which implies anti-VEGF, laser, or steroid treatment results in savings to the government.

**eTable 23. Simulated lifetime outcomes for a hypothetical 51-year old, treatment durability = 12 years**

|                  |                                  | Untreated | Anti-VEGF | Laser     | Steroid   |
|------------------|----------------------------------|-----------|-----------|-----------|-----------|
| Vision outcomes  | Years with Excellent or Good SRV | 15.5      | 17.5      | 17.0      | 16.9      |
|                  | Years with Fair or Poor SRV      | 12.5      | 11.4      | 11.5      | 11.6      |
| Direct effects   | Life expectancy (years)          | 28.0      | 28.9      | 28.5      | 28.5      |
|                  | Quality-adjusted life years      | 16.3      | 17.4      | 16.9      | 17.0      |
|                  | QALY (\$)                        | 1,680,698 | 1,786,537 | 1,740,987 | 1,746,398 |
| Indirect effects | Disability free life years       | 15.7      | 16.9      | 16.3      | 16.4      |
|                  | Years claiming disability        | 2.9       | 2.5       | 2.7       | 2.6       |
|                  | Disability benefits (\$)         | 14,392    | 12,191    | 13,474    | 13,032    |
|                  | Years working                    | 8.1       | 8.6       | 8.4       | 8.4       |
|                  | Earnings (\$)                    | 161,613   | 189,731   | 177,774   | 177,784   |

Notes: The value of a QALY is assumed to be \$150,000. Future dollar values are discounted at a rate of 3% per year. Disability benefits reflect government disability payments to an individual, which implies anti-VEGF, laser, or steroid treatment results in savings to the government.

**eTable 24. Simulated lifetime outcomes for a hypothetical 51-year old, treatment durability = 2 years**

|                  |                                  | Untreated | Anti-VEGF | Laser     | Steroid   |
|------------------|----------------------------------|-----------|-----------|-----------|-----------|
| Vision outcomes  | Years with Excellent or Good SRV | 15.5      | 16.9      | 16.3      | 16.3      |
|                  | Years with Fair or Poor SRV      | 12.5      | 12.0      | 12.1      | 12.2      |
| Direct effects   | Life expectancy (years)          | 28.0      | 28.8      | 28.4      | 28.4      |
|                  | Quality-adjusted life years      | 16.3      | 17.2      | 16.7      | 16.8      |
|                  | QALY (\$)                        | 1,680,698 | 1,765,729 | 1,720,011 | 1,725,457 |
| Indirect effects | Disability free life years       | 15.7      | 16.7      | 16.1      | 16.2      |
|                  | Years claiming disability        | 2.9       | 2.5       | 2.7       | 2.7       |
|                  | Disability benefits (\$)         | 14,392    | 12,570    | 13,862    | 13,429    |
|                  | Years working                    | 8.1       | 8.5       | 8.3       | 8.3       |
|                  | Earnings (\$)                    | 161,613   | 187,499   | 175,558   | 175,517   |

Notes: The value of a QALY is assumed to be \$150,000. Future dollar values are discounted at a rate of 3% per year. Disability benefits reflect government disability payments to an individual, which implies anti-VEGF, laser, or steroid treatment results in savings to the government.

**eTable 25. Cohort Sensitivity Analysis: Treatment Durability Assumptions**

| Durability assumption | Time horizon | Net Value (USD, billions)                              |                                                                        |
|-----------------------|--------------|--------------------------------------------------------|------------------------------------------------------------------------|
|                       |              | Treatment frequency assumption                         |                                                                        |
|                       |              | “Real world”<br>4 injections in year 1<br>3 in year 2+ | “Protocol T”<br>10 injections in year 1<br>6 in year 2<br>1 in year 3+ |
| Permanent             | 2 years      | 1.0                                                    | -5.8                                                                   |
|                       | 5 years      | 10.0                                                   | 6.9                                                                    |
|                       | 10 years     | 25.3                                                   | 26.4                                                                   |
|                       | 20 years     | 47.8                                                   | 52.8                                                                   |
| 12 years              | 2 years      | 1.0                                                    | -5.8                                                                   |
|                       | 5 years      | 9.5                                                    | 6.4                                                                    |
|                       | 10 years     | 21.6                                                   | 22.7                                                                   |
|                       | 20 years     | 34.2                                                   | 39.1                                                                   |
| 6 years               | 2 years      | 1.0                                                    | -5.8                                                                   |
|                       | 5 years      | 9.0                                                    | 5.9                                                                    |
|                       | 10 years     | 18.6                                                   | 19.6                                                                   |
|                       | 20 years     | 28.1                                                   | 33.1                                                                   |
| 2 years               | 2 years      | 1.0                                                    | -5.8                                                                   |
|                       | 5 years      | 8.5                                                    | 5.3                                                                    |
|                       | 10 years     | 14.2                                                   | 15.2                                                                   |
|                       | 20 years     | 16.5                                                   | 21.5                                                                   |

Notes: Net value calculated as total benefit minus total cost. Results assume value of a QALY equal to \$150K.

**eTable 26. Cohort Sensitivity Analysis: Value of a QALY**

|                     | Real world treatment frequency |        |        | Protocol T treatment frequency |        |        |
|---------------------|--------------------------------|--------|--------|--------------------------------|--------|--------|
|                     | QALY Value                     |        |        | QALY Value                     |        |        |
|                     | \$50K                          | \$100K | \$300K | \$50K                          | \$100K | \$300K |
| Two-year horizon    |                                |        |        |                                |        |        |
| Direct benefit      | 1.5                            | 3.0    | 9.1    | 1.5                            | 3.0    | 9.1    |
| Indirect benefit    | 1.05                           | 1.05   | 1.05   | 1.05                           | 1.05   | 1.05   |
| Total cost          | 4.6                            | 4.6    | 4.6    | 11.4                           | 11.4   | 11.4   |
| Net value           | -2.1                           | -0.6   | 5.6    | -8.9                           | -7.4   | -1.3   |
| Five-year horizon   |                                |        |        |                                |        |        |
| Direct benefit      | 5.5                            | 11.0   | 32.0   | 5.5                            | 11.0   | 32.0   |
| Indirect benefit    | 2.87                           | 2.87   | 2.87   | 2.87                           | 2.87   | 2.87   |
| Total cost          | 9.3                            | 9.3    | 9.3    | 12.5                           | 12.5   | 12.5   |
| Net value           | -0.9                           | 4.6    | 25.6   | -4.1                           | 1.4    | 22.4   |
| Twenty-year horizon |                                |        |        |                                |        |        |
| Direct benefit      | 21.0                           | 42.0   | 126.1  | 21.0                           | 42.0   | 126.1  |
| Indirect benefit    | 4.76                           | 4.76   | 4.76   | 4.76                           | 4.76   | 4.76   |
| Total cost          | 20.0                           | 20.0   | 20.0   | 15.0                           | 15.0   | 15.0   |
| Net value           | 5.8                            | 26.8   | 110.9  | 10.8                           | 31.8   | 115.9  |

Notes: All values are in USD (billions). Results assume permanent treatment durability.

**eTable 27. Cohort Sensitivity Analysis: Annual Weighted Drug Cost of Anti-VEGFs**

|                     | Real world treatment frequency |                    |                      | Protocol T treatment frequency |                    |                      |
|---------------------|--------------------------------|--------------------|----------------------|--------------------------------|--------------------|----------------------|
|                     | Annual cost of anti-VEGF drugs |                    |                      | Annual cost of anti-VEGF drugs |                    |                      |
|                     | \$432.49<br>(-50%)             | \$864.98<br>(Main) | \$1,297.47<br>(+50%) | \$432.49<br>(-50%)             | \$864.98<br>(Main) | \$1,297.47<br>(+50%) |
| Two-year horizon    |                                |                    |                      |                                |                    |                      |
| Total benefit       | 5.6                            | 5.6                | 5.6                  | 5.6                            | 5.6                | 5.6                  |
| Total cost          | 2.6                            | 4.6                | 6.7                  | 6.7                            | 11.4               | 16.2                 |
| Net value           | 3.0                            | 1.0                | -1.1                 | -1.1                           | -5.8               | -10.6                |
| Five-year horizon   |                                |                    |                      |                                |                    |                      |
| Total benefit       | 19.4                           | 19.4               | 19.4                 | 19.4                           | 19.4               | 19.4                 |
| Total cost          | 5.1                            | 9.3                | 13.5                 | 7.0                            | 12.5               | 18.0                 |
| Net value           | 14.3                           | 10.1               | 5.9                  | 12.4                           | 6.9                | 1.4                  |
| Twenty-year horizon |                                |                    |                      |                                |                    |                      |
| Total benefit       | 67.8                           | 67.8               | 67.8                 | 67.8                           | 67.8               | 67.8                 |
| Total cost          | 10.9                           | 20.0               | 29.0                 | 7.9                            | 15.0               | 22.1                 |
| Net value           | 56.9                           | 47.8               | 38.8                 | 59.9                           | 52.8               | 45.7                 |

Notes: All values are in USD (billions). Results assume permanent treatment durability and value of a QALY equal to \$150K.

## References

1. Goldman DP, Shekelle PG, Bhattacharya J, Hurd M, Joyce GF. Health status and medical treatment of the future elderly. 2004.
2. Gangnon RE, Davis MD, Hubbard LD, Aiello LM, Chew EY, Ferris FL, et al. A Severity Scale for Diabetic Macular Edema Developed from ETDRS Data. *Invest Ophthalmol Vis Sci*. 2008 Nov 1;49(11):5041.
3. Centers for Disease Control and Prevention. National Diabetes Statistics Report, 2020 [Internet]. 2022 Jan [cited 2022 Jul 20]. Available from: <https://www.cdc.gov/diabetes/data/statistics-report/index.html>.
4. Varma R, Bressler NM, Doan QV, Gleeson M, Danese M, Bower JK, et al. Prevalence of and Risk Factors for Diabetic Macular Edema in the United States. *JAMA Ophthalmol*. 2014 Nov 1;132(11):1334.
5. DRCR Retina Network. Protocol T (NCT01627249) dataset [Internet]. Available from: <https://public.jaeb.org/drcrnet/stdy/206>
6. Centers for Medicare and Medicaid Services. Physician Fee Schedule [Internet]. 2022. Available from: <https://www.cms.gov/medicare/physician-fee-schedule/search/overview>
